# Supplementary material for: Co-liposomes of redox-active alkyl-ferrocene modified low MW branched PEI and DOPE for efficacious gene delivery in serum
Source: Royal Society of Chemistry journal article supplement (doi:10.1039/c4tb01771d), 2015-01-01
Supplement: c4tb01771d1.pdf [file c4tb01771d1.pdf]

## Supplementary Information

# Co-liposomes of Redox-Active Alkyl-Ferrocene Modified Low MW Branched PEI and DOPE for Efficacious Gene Delivery in Serum

*Krishan Kumar,<sup>‡a</sup> Gururaja Vulugundam,<sup>‡a</sup> Paturu Kondaiah,<sup>b</sup> and Santanu Bhattacharya<sup>\*a,c</sup>*

<sup>a</sup> Department of Organic Chemistry and <sup>b</sup> Department of Molecular Reproduction, Development and Genetics, Indian Institute of Science, Bangalore 560 012, India.

<sup>c</sup> Chemical Biology Unit, Jawaharlal Nehru Centre for Advanced Scientific Research, Bangalore, India. E-mail: sb@orgchem.iisc.ernet.in; Fax: +91-80-23600529; Tel: +91-80-22932664

\* To whom correspondence should be addressed.

‡ These authors contributed equally to this work.

**Table S1. Average particle size and Zeta potential of each suspension of various redox lipopolymers alone in water in their reduced and oxidized states.<sup>a</sup>**

| Lipopolymer | % Ferrocene grafting | Reduced                    |             | Oxidized                   |             | Average Zeta potential (mV) |            |
|-------------|----------------------|----------------------------|-------------|----------------------------|-------------|-----------------------------|------------|
|             |                      | Hydrodynamic diameter (nm) | PDI         | Hydrodynamic diameter (nm) | PDI         | Reduced                     | Oxidized   |
| P8-C6-F1    | 15                   | 87 ± 8                     | 0.16 ± 0.02 | 170 ± 5                    | 0.19 ± 0.03 | 46 ± 0.5                    | 57 ± 2     |
| P8-C6-F2    | 23                   | 100 ± 10                   | 0.16 ± 0.02 | 175 ± 5                    | 0.21 ± 0.02 | 40 ± 1                      | 48.5 ± 1.5 |
| P8-C6-F3    | 48                   | 132 ± 10                   | 0.24 ± 0.03 | 205 ± 15                   | 0.27 ± 0.05 | 37 ± 0.8                    | 43 ± 2.5   |
| P8-C11-F1   | 14                   | 140 ± 8                    | 0.11 ± 0.01 | 215 ± 5                    | 0.13 ± 0.02 | 41 ± 1.2                    | 48 ± 1.8   |
| P8-C11-F2   | 24                   | 165 ± 5                    | 0.19 ± 0.02 | 270 ± 20                   | 0.22 ± 0.03 | 37 ± 0.5                    | 52 ± 2.2   |
| P8-C11-F3   | 55                   | 220 ± 5                    | 0.23 ± 0.05 | 290 ± 20                   | 0.26 ± 0.03 | 36 ± 1.5                    | 57 ± 2.9   |

<sup>a</sup> Hydrodynamic diameters (average) and Poly Dispersity Index (PDI) obtained from the DLS measurements. Each measurement represents the mean ± SD of five independent measurements.

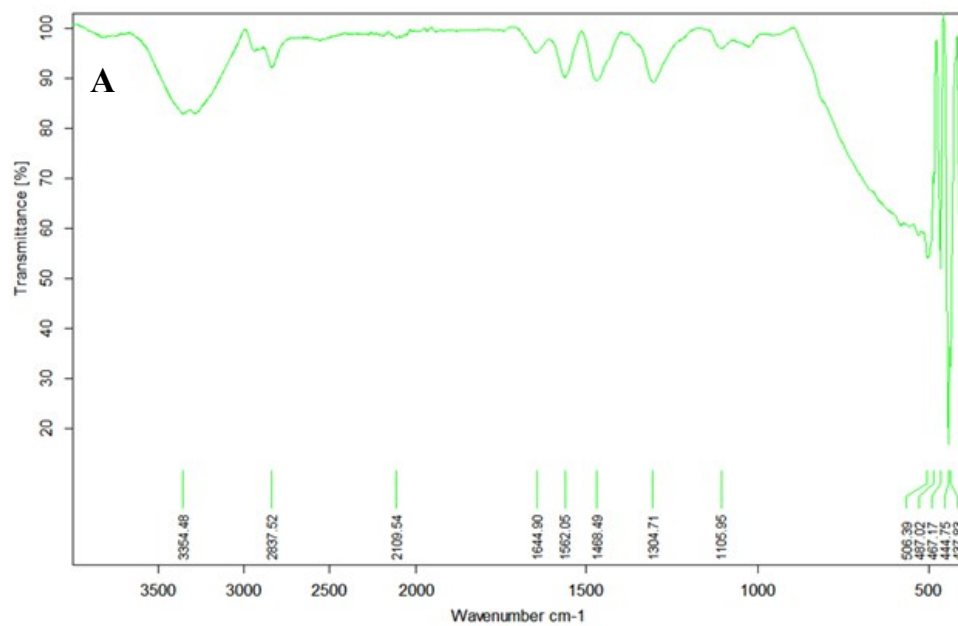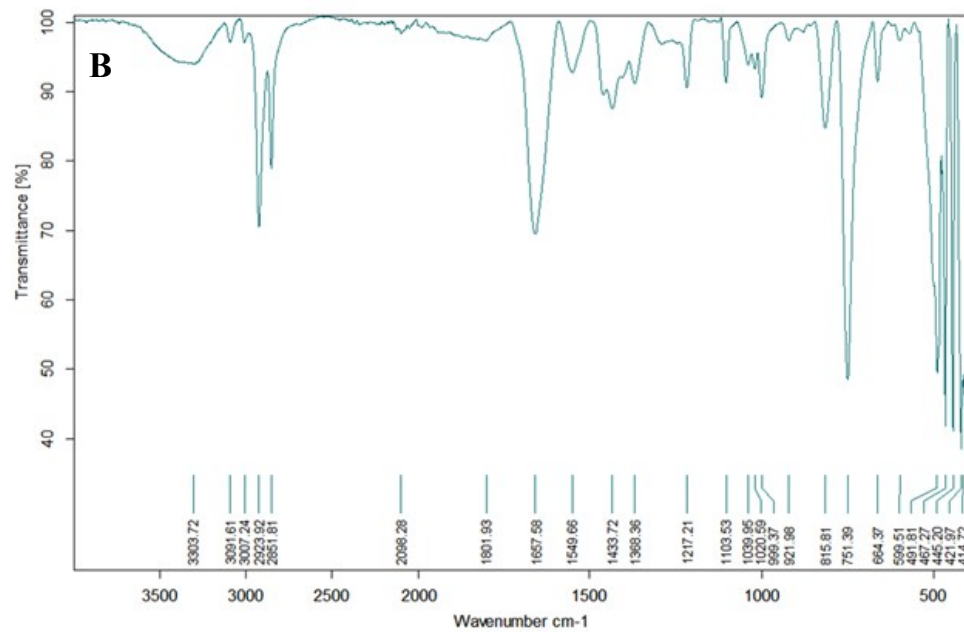

**Fig. S1** IR spectra of native BPEI (800 Da) (A) and an alkyl-ferrocene modified BPEI (800 Da), P8-C6-F1 (B).

The peak at  $1560\text{ cm}^{-1}$  corresponds to the bending vibration of the  $\text{NH}_2$  groups, while the peaks at  $1045$  and  $1105\text{ cm}^{-1}$  are attributed to the symmetric and asymmetric stretching bands of imine groups respectively. The peaks at  $1468$ ,  $2837$  and  $2940\text{ cm}^{-1}$  correspond to the symmetric and asymmetric stretching bands of  $\text{CH}_2$  respectively. After the alkyl-ferrocene modification of the BPEI, the characteristic peaks of ferrocene were observed at  $815$ ,  $1433$  and  $3091\text{ cm}^{-1}$ .

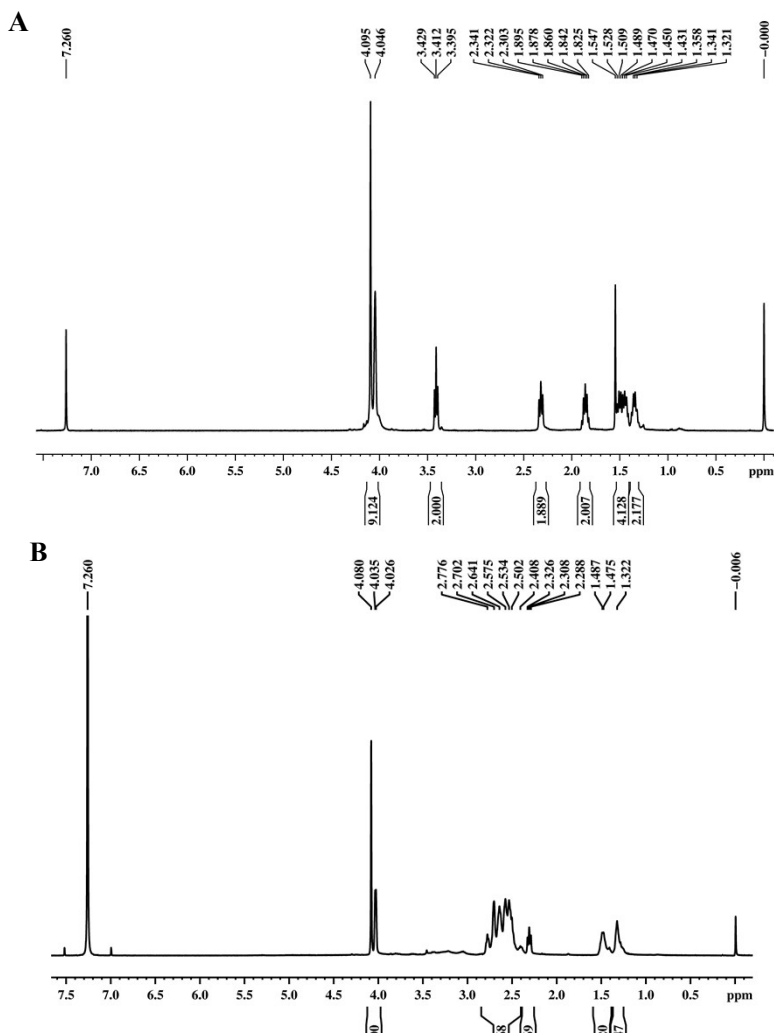

**Fig. S2.**  $^1\text{H}$  NMR spectra of the (6-bromohexyl) ferrocene (A) and P8-C6-F1 (B) in  $\text{CDCl}_3$ .

In the  $^1\text{H}$ -NMR of the reactant 6-bromohexyl ferrocene (Fig. S2A), the triplet at  $\delta = 3.412$  ppm corresponds to  $-\text{CH}_2-\text{CH}_2-\text{Br}$  which disappeared upon reaction with PEI. The  $^1\text{H}$ -NMR of P8-C6-F1 (Fig. S2B) showed the peaks at  $\delta = 4.03\text{--}4.08$  ppm (9 Hs) which correspond to ferrocene moiety.

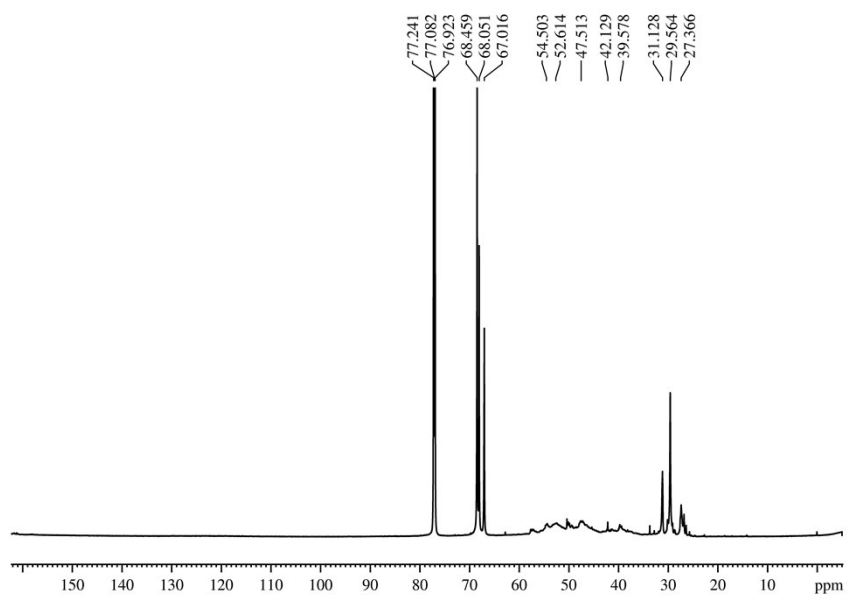

**Fig. S3**  $^{13}\text{C}$  NMR (200 MHz) of P8-C6-F1 in  $\text{CDCl}_3$ .

$^{13}\text{C}$  NMR (Fig. S3) further confirmed the covalent grafting of alkyl ferrocene on the BPEI backbone. The signals between 39–55 ppm correspond to  $-\text{CH}_2\text{CH}_2\text{N}-$  and  $-\text{NCH}_2-(\text{CH}_2)_5\text{Fc}$  to PEI and the signals 67.0, 68.0 and 68.5 ppm correspond to ferrocene ring.

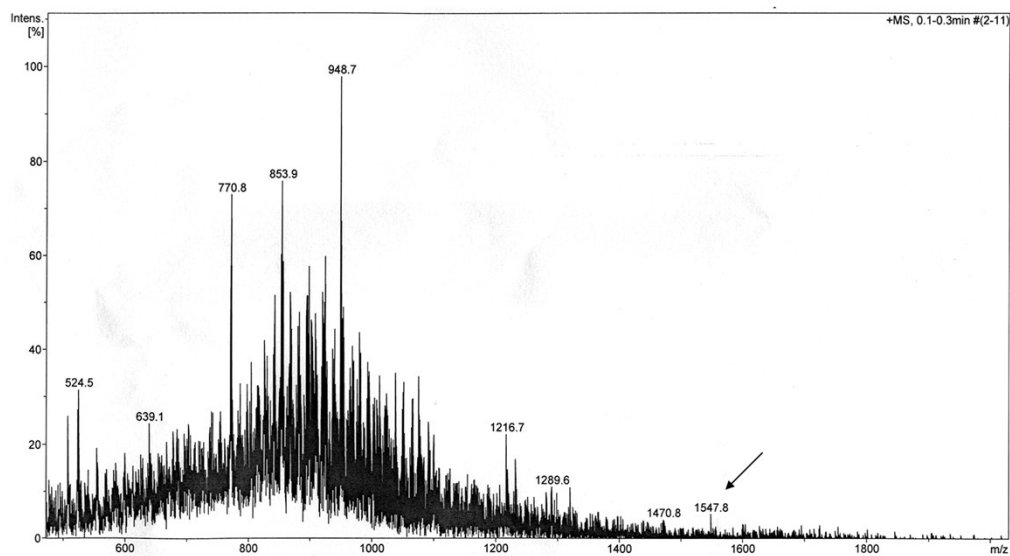

**Fig. S4** ESI-MS spectra of P8-C6-F1.

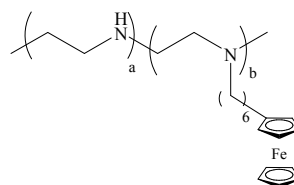

Molecular weight of each repeating unit in native BPEI 800 Da is 43. Theoretical number of repeating units in unmodified BPEI 800 Da is  $800/43 = 18.6$

Mass of P8-C6-F1 (15% grafting) based on  $^1\text{H}$  NMR is

$$[(43 \times 0.8) + (312 \times 0.151)] \times 18.6 = 1550.3$$

In the mass spectrum of P8-C6-F1, a peak at  $m/z = 1547.8$  was observed which indicates the molecular ion peak of P8-C6-F1.

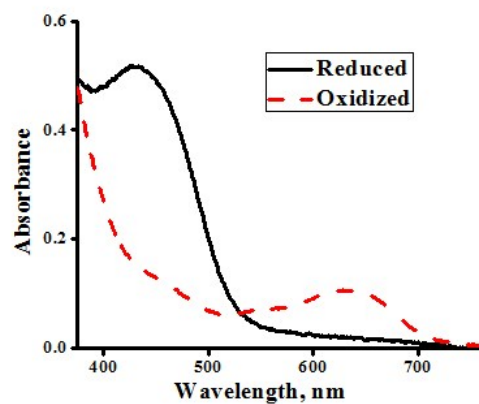

**Fig. S5** UV-Vis spectra of lipopolymer P8-C6-F1 (A) before and (B) after oxidation at a concentration of 1 mg/mL.

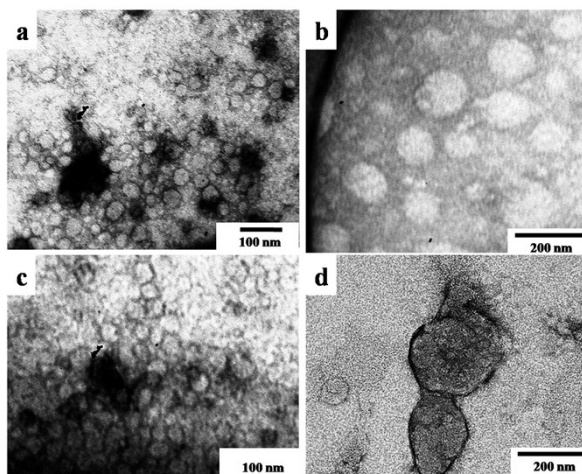

**Fig. S6** Representative TEM images of redox lipopolymers P8-C6-F1 (a, b) and P8-C11-F1 (c, d) before (a, c) and after oxidation (b, d).

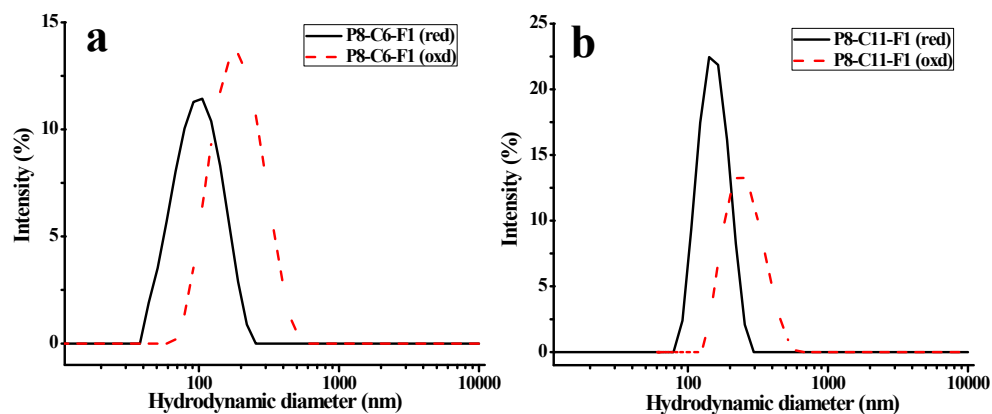

**Fig. S7** Hydrodynamic diameter distribution of the neat redox lipopolymeric aggregates in water (a) P8-C6-F1 and (b) P8-C11-F1 before (solid line) and after (dashed line) oxidation by  $\text{FeCl}_3$ .

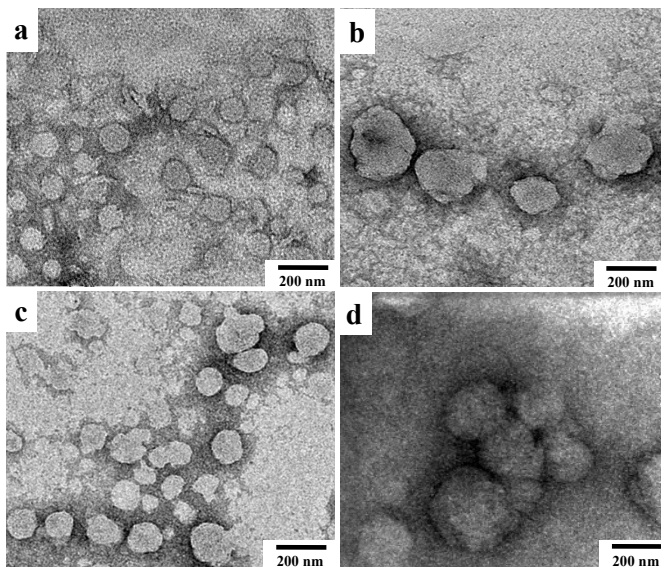



**Fig. S8** Representative TEM images of co-liposomes containing DOPE and redox lipopolymers P8-C6-F1 (a, b) and P8-C11-F1 (c, d) before (a, c) and after oxidation (b, d).

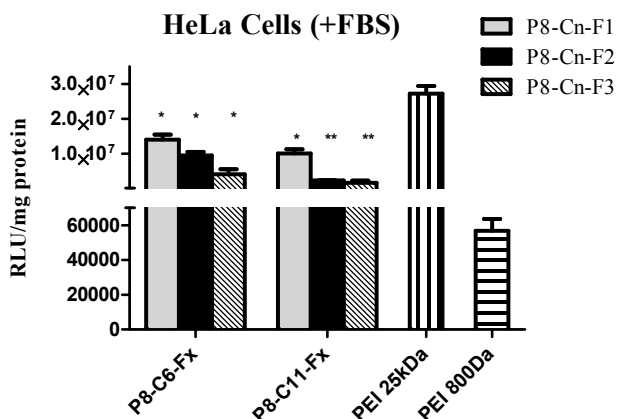

**Fig. S9** Gene transfection capability (luciferase activity) of the ferrocene modified polymers alone and native BPEI 800Da using BPEI (25kDa) as a positive control in HeLa cells in the presence of 10% serum. The luciferase activities were examined for statistical significance in comparison with BPEI (25 KDa) transfections (\* $P < 0.05$  and \*\* $P < 0.01$ , Two-tailed Student's t-test).

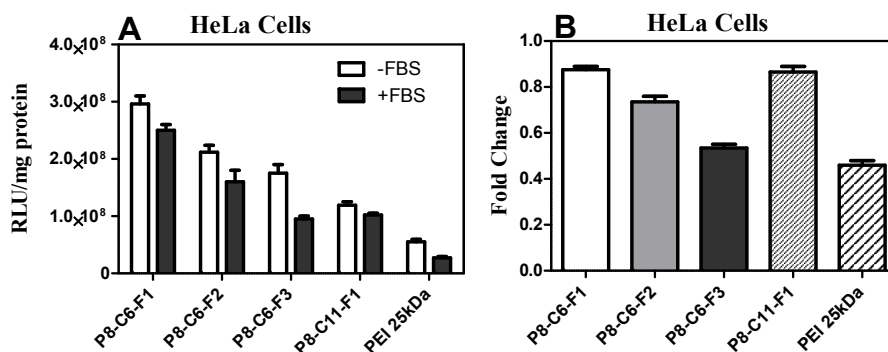

**Fig. S10** (A) Luciferase activities of efficient lipopolymeric co-liposomal formulations in the absence of serum (-FBS) and presence of serum (+FBS). (B) The fold change in transfection activities in serum relative to those in absence of serum. The results are based on triplicates of three independent experiments.

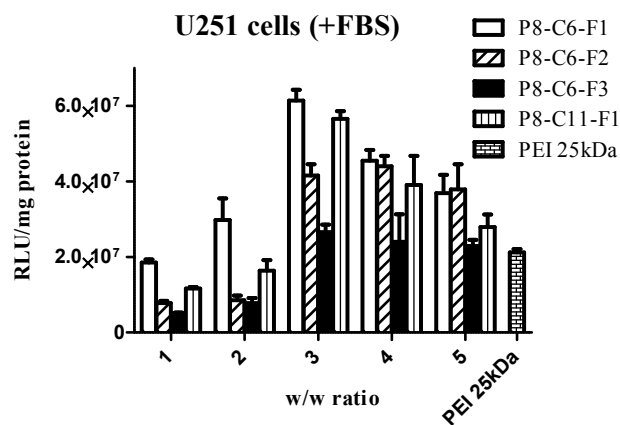

**Fig. S11** Transfection efficacies (luciferase activity) of four efficient redox lipopolymer formulations in their reduced state in U251 cells in the presence of serum (10% FBS). The cells were transfected with 0.4  $\mu$ g of pGL3 control plasmid DNA while using BPEI (25kDa) as a positive control.

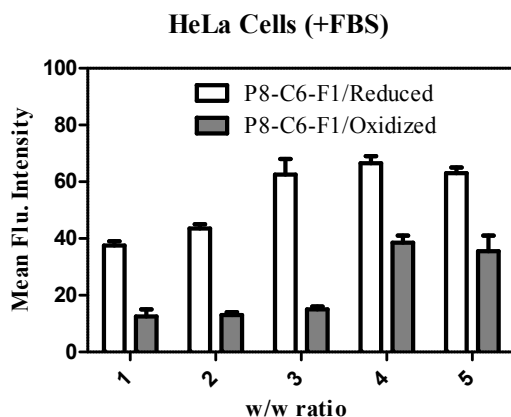

**Fig. S12** GFP expression analysis of transfections obtained from flow cytometry for the most efficient co-liposomal formulation at different w/w ratios before and after the oxidation of ferrocene in HeLa cells in the presence of serum (10% FBS).

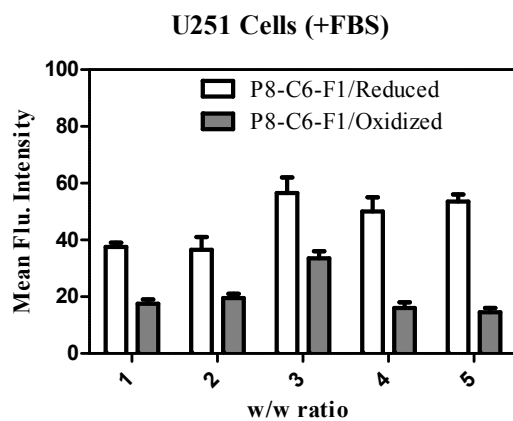

**Fig. S13** GFP expression analysis of transfections obtained from flow cytometry for the most efficient co-liposomal formulation at different w/w ratios before and after the oxidation of ferrocene in U251 cells in the presence of serum (10% FBS).
